# Supplementary material for: Comparison of glycoside hydrolase family 3 β-xylosidases from basidiomycetes and ascomycetes reveals evolutionarily distinct xylan degradation systems
Source: PubMed Central journal article supplement (PMC8913315; doi:10.1016/j.jbc.2022.101670), 2022-02-01
Supplement: mmc1.pdf [file mmc1.pdf]

Supplementary Materials for

**Comparison of Glycoside Hydrolase family 3  $\beta$ -xylosidases from basidiomycetes and ascomycetes reveals evolutionarily distinct xylan degradation systems**

Keisuke Kojima<sup>1</sup>, Naoki Sunagawa<sup>1</sup>, Nils Egil Mikkelsen<sup>2</sup>, Henrik Hansson<sup>2</sup>, Saeid Karkehabadi<sup>2</sup>,  
Masahiro Samejima<sup>1,3</sup>, Mats Sandgren<sup>2</sup> and Kiyohiko Igarashi<sup>1,4\*</sup>

Figure legend

Figure S1. Sequence alignment of *TrXyl3A* and *PcBxl3*

The amino acid sequences of *TrXyl3A* and *PcBxl3* were aligned by Clustal W (42). The upper sequence is *TrXyl3A* and the lower is *PcBxl3*.

*PcBxl3* 1 -----A**F**P**D**C**A**N**G**P**L**K**S**N**L**V**C**N**A**S**A**D**P**V**S**R**A**K**A**L**V**D**A**L  
*TrXyl3A* 1 Q**N**N**Q**T**Y**A**N**Y**S**A**Q**G**Q**P**D**L**Y**P**E**T**L**A**T**L**T**L**S**F**P**D**C**E**H**G**P**L**K**N**N**L**V**C**D**S**S**A**G**Y**V**E**R**A**Q**A**L**I**S**L**F**

*PcBxl3* 34 **T**L**E**E**L**V**N**N**T**V**N**A**S**P**G**V**P**R**V**G**L**P**P**Y**N**W**S**E**A**L**H**G**V**A**R**S**P**G**T**N**F**S**T**V**P**G**S**P**F**S**S**A**T**S**F**P**Q**P**I**  
*TrXyl3A* 61 **L**T**L**E**E**L**I**L**N**T**Q**N**S**G**P**G**V**P**R**L**G**L**P**N**Y**Q**V**W**N**E**A**L**H**G**L**D**R**A**N**---F**A**T**K**G**G**Q**F**E**W**A**T**S**F**P**M**P**I**

*PcBxl3* 94 **I**L**G**A**T**F**D**D**D**L**I**H**S**I**A**T**V**I**S**T**E**A**R**A**F**N**N**A**G**R**A**G**L**D**F**F**T**P**N**I**N**P**F**K**D**P**R**W**G**R**G**O**E**T**P**G**E**D**P**Y  
*TrXyl3A* 117 **L**T**T**A**A**L**N**R**T**L**I**H**Q**I**A**D**I**I**S**T**Q**A**R**A**F**S**N**S**G**R**Y**G**L**D**V**Y**A**P**N**V**N**G**F**R**S**P**L**W**G**R**G**O**E**T**P**G**E**D**A**F

*PcBxl3* 154 **H**I**A**-**Q**Y**V**Y**Q**L**I**T**G**L**Q**G**L**S**P**D**P**Y**Y**K**V**V**A**D**C**K**H**F**A**G**Y**D**L**E**D**W**H**G**N**N**R**M**A**F**N**A**V**I**S**T**Q**D**L**A**E**  
*TrXyl3A* 177 **F**L**S**S**A**Y**T**Y**E**Y**I**T**G**I**Q**G**G**V**D**P-E**H**L**K**V**A**A**T**V**K**H**F**A**G**Y**D**L**E**N**W**N**N**Q**S**R**L**G**F**D**A**I**I**T**Q**D**L**S**E**

*PcBxl3* 213 **F**Y**T**P**S**F**Q**S**C**V**R**D**A**H**V**G**S**V**M**C**S**Y**N**A**V**N**G**V**P**S**C**A**S**P**Y**L**L**Q**D**L**I**R**D**H**F**G**L**G**D**G-W**I**T**S**D**C**D**A**V  
*TrXyl3A* 236 **Y**Y**T**P**Q**F**L**A**A**A**R**Y**A**K**S**R**S**L**M**C**A**Y**N**S**V**N**G**V**P**S**C**A**N**S**F**F**L**Q**T**L**R**E**S**W**G**F**P**E**W**G**Y**V**S**D**C**D**A**V

*PcBxl3* 272 **D**N**V**F**D**P**H**N**Y**T**S**T**L**V**N**A**S**A**V**S**L**K**A**G**T**D**V**D**C**G**T**Y**S**Q**T**L**V**D**A**V**N**Q**K**L**V**T**E**D**D**V**K**T**S**M**V**R**L**Y**S**  
*TrXyl3A* 296 **Y**N**V**F**N**P**H**D**Y**A**S**N**Q**S**S**A**A**A**S**S**L**R**A**G**T**D**I**D**C**G**Q**T**Y**P**W**H**L**N**E**S**F**V**A**G**E**V**S**R**G**E**I**E**R**S**V**T**R**L**Y**A

*PcBxl3* 332 **S**L**V**R**L**G**Y**F**D**S**P**E**N**O**P**W**R**O**L**G**W**A**D**V**N**T**P**S**A**Q**A**L**A**L**T**A**A**E**E**G**V**V**L**L**K**N**D**G**T**L**P**L**S**R**R**I**K**H**I**A  
*TrXyl3A* 356 **N**L**V**R**L**G**Y**F**D**--**K**K**N**Q**Y**R**S**L**G**W**K**D**V**V**K**T**D**A**W**N**I**S**Y**E**A**A**V**E**G**I**V**L**L**K**N**D**G**T**L**P**L**S**K**K**V**R**S**I**A**

*PcBxl3* 392 **V**V**G**P**W**A**N**A**T**T**Q**M**O**G**N**Y**Q**G**I**A**P**F**L**I**S**P**L**Q**A**L**O**D**A**G**F**H**V**S**F**A**N**G**T**A**I**N**S**T**D**T**S**G**F**A**S**A**L**M**A**A  
*TrXyl3A* 414 **L**I**G**P**W**A**N**A**T**T**Q**M**O**G**N**Y**Y**G**P**A**P**Y**L**I**S**P**L**E**A**A**K**K**A**G**Y**H**V**N**F**E**L**G**T**E**I**A**G**N**S**T**T**G**F**A**K**A**I**A**A**A

*PcBxl3* 452 **K**A**A**D**A**I**V**F**A**G**G**I**D**E**T**I**E**S**E**G**H**D**R**D**S**T**E**W**P**G**N**Q**L**D**L**I**E**Q**L**A**A**L**R**K**P**L**I**V**L**Q**M**G**G**Q**V**D**S**S  
*TrXyl3A* 474 **K**K**S**D**A**I**I**Y**L**G**G**I**D**N**T**I**E**Q**E**G**A**D**R**T**D**I**A**W**P**G**N**Q**L**D**L**I**K**Q**L**S**E**V**G**K**P**L**V**V**L**Q**M**G**G**Q**V**D**S**S

*PcBxl3* 512 **L**K**A**S**K**A**V**N**A**L**L**W**G**G**Y**P**G**Q**S**G**G**T**A**I**V**N**I**L**T**G**K**T**A**P**S**G**R**L**P**I**T**O**Y**P**A**A**Y**V**D**A**I**P**M**T**D**M**A**L**R**P  
*TrXyl3A* 534 **L**K**S**N**K**K**V**N**S**L**V**W**G**G**Y**P**G**Q**S**G**G**V**A**L**F**D**I**L**S**G**K**R**A**P**A**G**R**L**V**T**T**O**Y**P**A**E**Y**V**H**Q**F**P**Q**N**D**M**N**L**R**P

*PcBxl3* 572 **S**S-S**S**P**G**R**T**Y**K**W**Y**T**G**T**P**V**F**D**F**G**F**G**L**H**Y**T**S**F**K**L**S**W**A**A**S**P**P**S**R**F**D**I**S**S**L**V**A**G**A**K**H**A**G**V**A**F**T**D  
*TrXyl3A* 594 **D**G**K**S**N**P**G**Q**T**Y**I**W**Y**T**G**K**P**V**Y**E**F**G**S**G**L**F**Y**T**T**F**K**E**T**L**A**S**H**P**K**S**L**K**F**N**T**S**S**I**L**S**A**P**H**P**G**Y**T**Y**S**E

*PcBxl3* 631 **L**A**P**L**F**T**F**H**V**A**V**K**N**S**G**K**V**T**S**D**Y**V**A**L**L**F**A**H**T**T-V**G**P**S**P**A**P**Q**Q**E**L**V**A**Y**T**R**V**K**G**T**P**G**R**T**A**T**A**A**  
*TrXyl3A* 654 **Q**I**P**V**F**T**F**E**A**N**I**K**N**S**G**K**T**E**S**P**Y**T**A**M**L**F**V**R**T**S**N**A**G**P**A**P**Y**P**N**K**W**L**V**G**F**D**R**L**A**D**I**K**P**G**H**S**S**K**L**S

*PcBxl3* 690 **L**S**V**T**L**G**S**I**A**R**V**D**E**S**G**V**R**S**L**Y**P**G**K**Y**S**V**W**V**D**T**T**R**E**I**M**H**T**F**E**L**T**G**K**T**T**Q**I**L**G**W**P**Q**P**R-----  
*TrXyl3A* 714 **I**P**I**P**V**S**A**L**A**R**V**D**S**H**G**N**R**I**V**Y**P**G**K**Y**E**L**A**L**N**T**D**E**S**V**K**L**E**F**E**L**V**G**E**E**V**T**I**E**N**W**P**L**E**E**Q**Q**I**K**D**A

*PcBxl3* 774 ----  
*TrXyl3A* 774 **T**P**D**A

Figure S1
